# Supplementary material for: Impacts of fire severity and salvage-logging on soil carbon fluxes in a boreal forest
Source: Copernicus journal article supplement (doi:10.5194/egusphere-2024-2016), 2024-07-09
Supplement: Supplementary file 1 [file egusphere-2024-2016-supplement.pdf]

1 **SUPPLEMENTARY INFORMATION**

2

3 **Impacts of fire severity and salvage-logging on soil carbon fluxes in a**  
4 **boreal forest**

5 Julia Kelly<sup>1</sup>, Stefan H. Doerr<sup>2</sup>, Johan Ekroos<sup>3,4</sup>, Theresa S. Ibáñez<sup>5</sup>, Md. Rafikul Islam<sup>1</sup>, Cristina Santín<sup>6,7</sup>,  
6 Margarida Soares<sup>1</sup>, Natascha Kljun<sup>1</sup>

7

8 <sup>1</sup>Centre for Environmental and Climate Science (CEC), Lund University, Lund, Sweden

9 <sup>2</sup>Geography Department, Swansea University, Swansea, UK

10 <sup>3</sup>Department of Agricultural Sciences, University of Helsinki, Helsinki, Finland

11 <sup>4</sup>Helsinki Institute of Sustainability Science (HELSUS), University of Helsinki, Finland

12 <sup>5</sup>Department of Wildlife, Fish and Environmental Studies, Swedish University of Agricultural Sciences, Umeå, Sweden

13 <sup>6</sup>Research Institute of Biodiversity (IMIB), Spanish National Research Council-University of Oviedo, Spain

14 <sup>7</sup>Biosciences Department, Swansea University, UK

15

16 *Correspondence to:* Julia Kelly ([julia.kelly@cec.lu.se](mailto:julia.kelly@cec.lu.se))

17

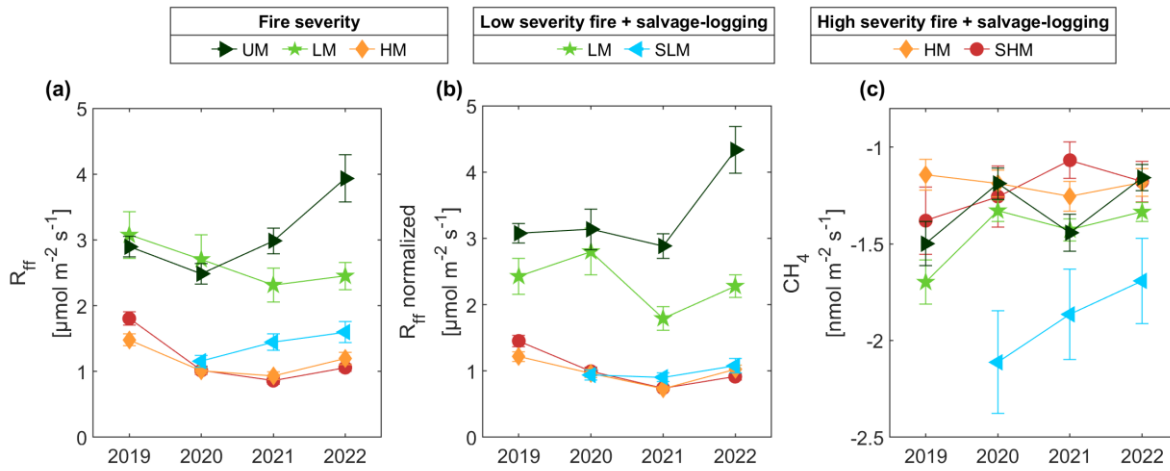

18

19 Figure S1. July-August means ( $\pm$ SE) of forest floor respiration ( $R_{ff}$ ), normalized  $R_{ff}$  ( $R_{ff\_norm}$ ) and soil  
 20  $CH_4$  flux for 2019-2022.  $R_{ff\_norm}$  is normalized to soil temperature of 15 °C and 10% soil water content.

21 See Table 1 for site names.

22

23 Table S1. Results of ANOVAs on the mixed effects models of the forest floor respiration flux data using only July-August  
 24 2019-2022 data. Low + SL is low-severity fire followed by salvage-logging, High + SL is high-severity fire followed by  
 25 salvage-logging. Interactions were only included in the models if significant. The interaction of Site  $\times$  Tsoil was not significant  
 26 in any model. Tsoil = soil temperature at 5 cm depth, df = numerator degrees of freedom, denominator degrees of freedom.  
 27  $R^2_{\text{marg}}$  = marginal  $R^2$  (variance explained by fixed effects),  $R^2_{\text{con}}$  = conditional  $R^2$  (variance explained by the fixed and random  
 28 effects), RMSE = root mean square error ( $\mu\text{mol CO}_2 \text{ m}^{-2} \text{ s}^{-1}$ ). Statistically significant effects are marked in bold ( $p < 0.05$ ).

| Group         | Site  |       |                  | Time   |       |                  | Tsoil  |       |                  | Site $\times$ Time |      |                  | Model fit           |                    |       |
|---------------|-------|-------|------------------|--------|-------|------------------|--------|-------|------------------|--------------------|------|------------------|---------------------|--------------------|-------|
|               | df    | F     | p                | df     | F     | p                | df     | F     | p                | df                 | F    | p                | $R^2_{\text{marg}}$ | $R^2_{\text{con}}$ | RMSE  |
| Fire severity | 2, 33 | 31.96 | <b>&lt;0.001</b> | 1, 236 | 8.00  | <b>0.005</b>     | 1, 236 | 13.46 | <b>&lt;0.001</b> | 2, 236             | 8.72 | <b>&lt;0.001</b> | 0.497               | 0.766              | 0.270 |
| Low + SL      | 1, 22 | 10.22 | <b>0.004</b>     | 1, 118 | 2.97  | 0.087            | 1, 118 | 3.83  | 0.053            | -                  | -    | -                | 0.220               | 0.757              | 0.261 |
| High + SL     | 1, 22 | 0.004 | 0.953            | 1, 157 | 26.50 | <b>&lt;0.001</b> | 1, 157 | 27.28 | <b>&lt;0.001</b> | 1, 157             | 4.75 | <b>0.031</b>     | 0.246               | 0.363              | 0.273 |

29  
 30 Table S2. Results of ANOVAs on the mixed effects models of the soil  $\text{CH}_4$  flux data, using only July-August 2019-2022 data.  
 31 Low + SL is low-severity fire followed by salvage-logging, High + SL is high-severity fire followed by salvage-logging.  
 32 Interactions were only included in the models if significant. The interaction of Site  $\times$  Time was not significant in any model.  
 33 SWC is soil water content at 0-6 cm depth. df = numerator degrees of freedom, denominator degrees of freedom,  $R^2_{\text{marg}}$  =  
 34 marginal  $R^2$  (variance explained by fixed effects),  $R^2_{\text{con}}$  = conditional  $R^2$  (variance explained by the fixed and random effects),  
 35 RMSE = root mean square error ( $\text{nmol CH}_4 \text{ m}^{-2} \text{ s}^{-1}$ ). Statistically significant effects are marked in bold ( $p < 0.05$ ).

| Group         | Site  |       |              | SWC    |        |                  | Time   |       |       | Site $\times$ SWC |        |              | Model fit           |                    |       |
|---------------|-------|-------|--------------|--------|--------|------------------|--------|-------|-------|-------------------|--------|--------------|---------------------|--------------------|-------|
|               | df    | F     | p            | df     | F      | p                | df     | F     | p     | df                | F      | p            | $R^2_{\text{marg}}$ | $R^2_{\text{con}}$ | RMSE  |
| Fire severity | 2, 33 | 1.145 | 0.330        | 1, 237 | 30.778 | <b>&lt;0.001</b> | 1, 237 | 1.013 | 0.315 | -                 | -      | -            | 0.090               | 0.617              | 0.213 |
| Low + SL      | 1, 22 | 9.761 | <b>0.005</b> | 1, 117 | 19.477 | <b>&lt;0.001</b> | 1, 117 | 0.262 | 0.610 | 1, 117            | 10.400 | <b>0.002</b> | 0.198               | 0.702              | 0.333 |
| High + SL     | 1, 22 | 0.008 | 0.928        | 1, 158 | 5.204  | <b>0.024</b>     | 1, 158 | 0.092 | 0.762 | -                 | -      | -            | 0.006               | 0.669              | 0.236 |

37  
 38  
 39  
 40  
 41

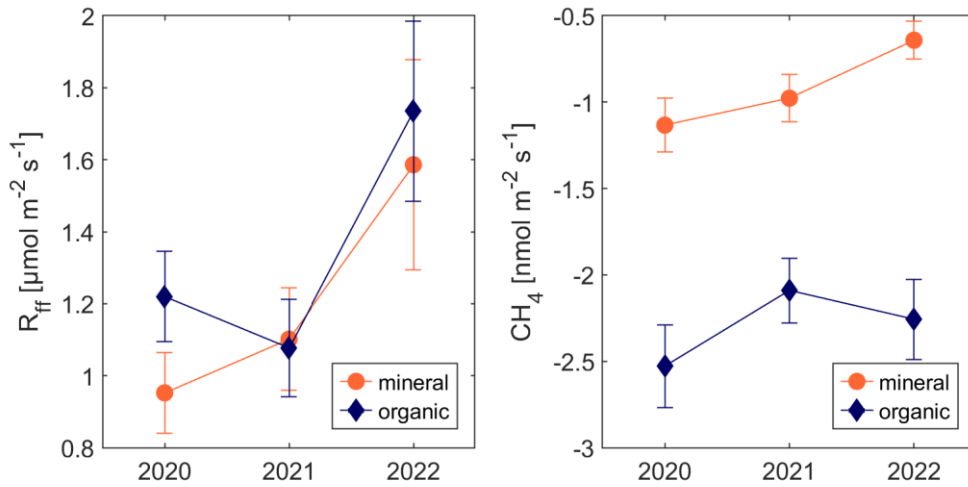

42

43 Figure S2. Growing season mean ( $\pm$ SE) forest floor respiration ( $R_{ff}$ ) and  $\text{CH}_4$  fluxes at SLM (low-severity  
44 fire, living trees salvage-logged), divided into collars where soil organic layer is intact ('organic') and  
45 collars where the mineral soil is exposed due to the scarification ('mineral').

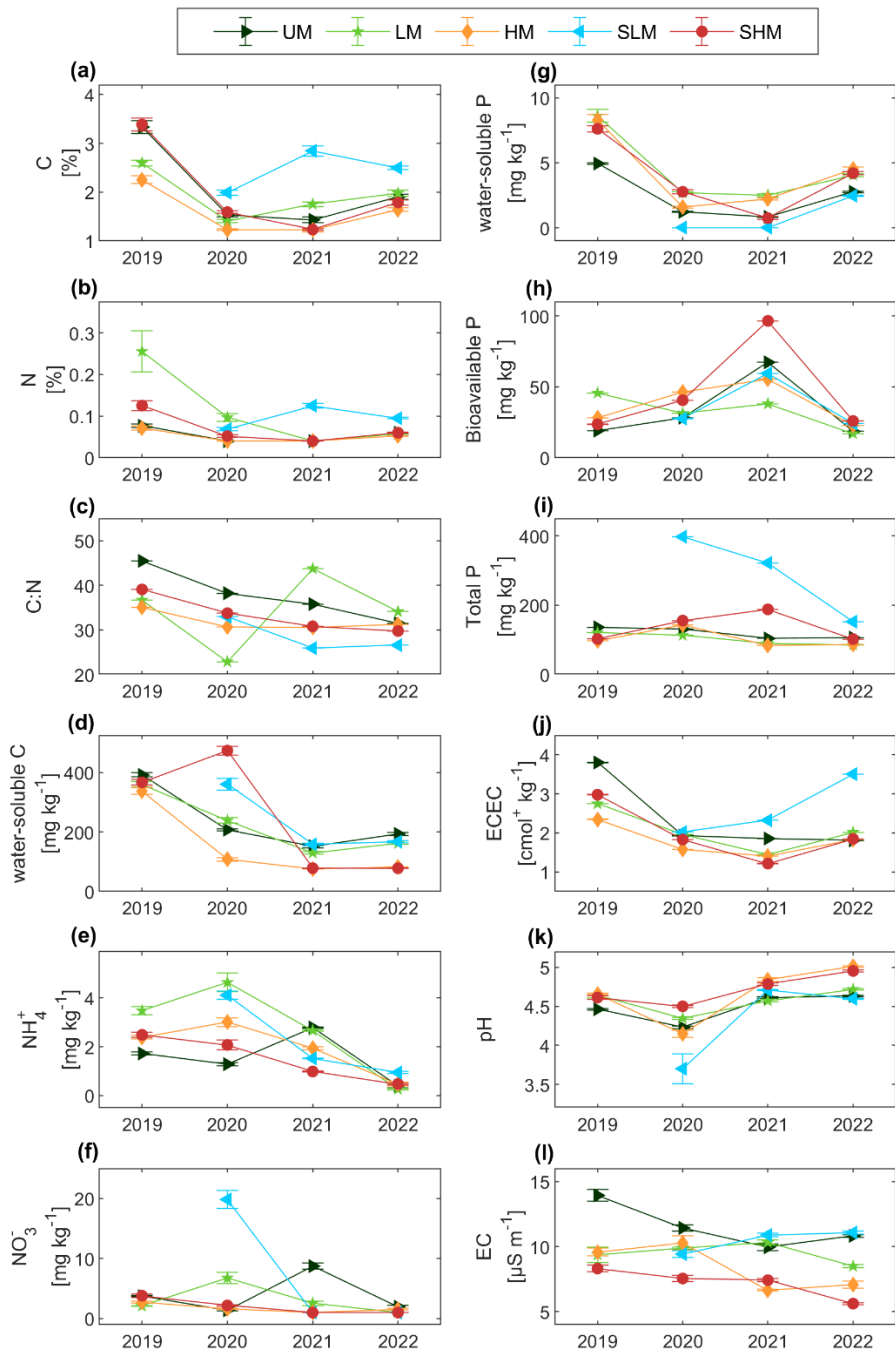

46

47 Figure S3. Time series of yearly mean (±SE) soil nutrient content in the mineral soil (0-2 cm depth) at all  
 48 sites. See Table 1 for site names.

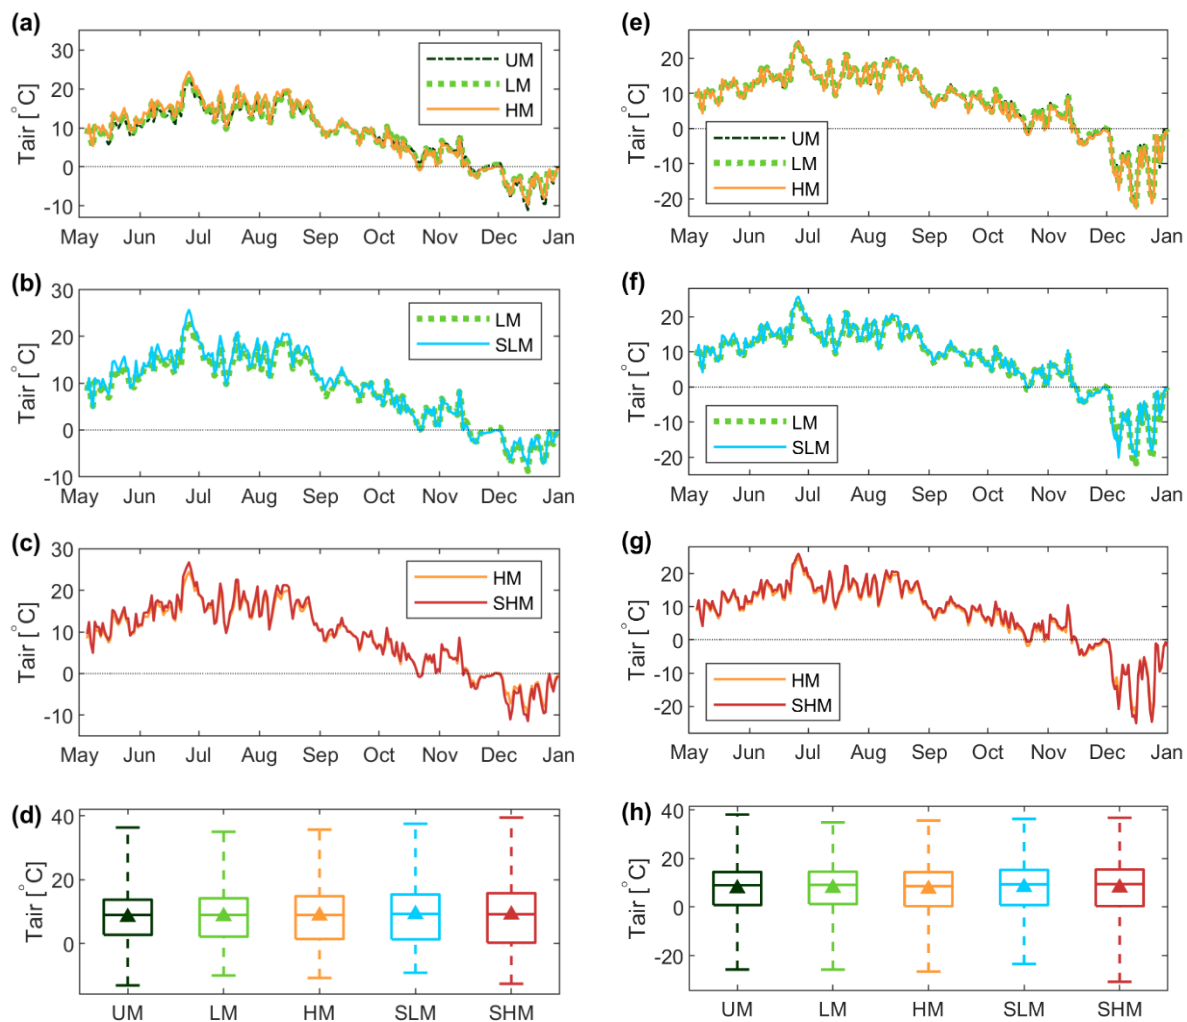

70 Figure S4. Daily mean and boxplot of air temperatures at 1.5cm above the surface (a-d) and 14 cm above  
 71 the surface (e-h). In all boxplots the triangle shows the mean. See Table 1 for site names.

72

73

74

75

76

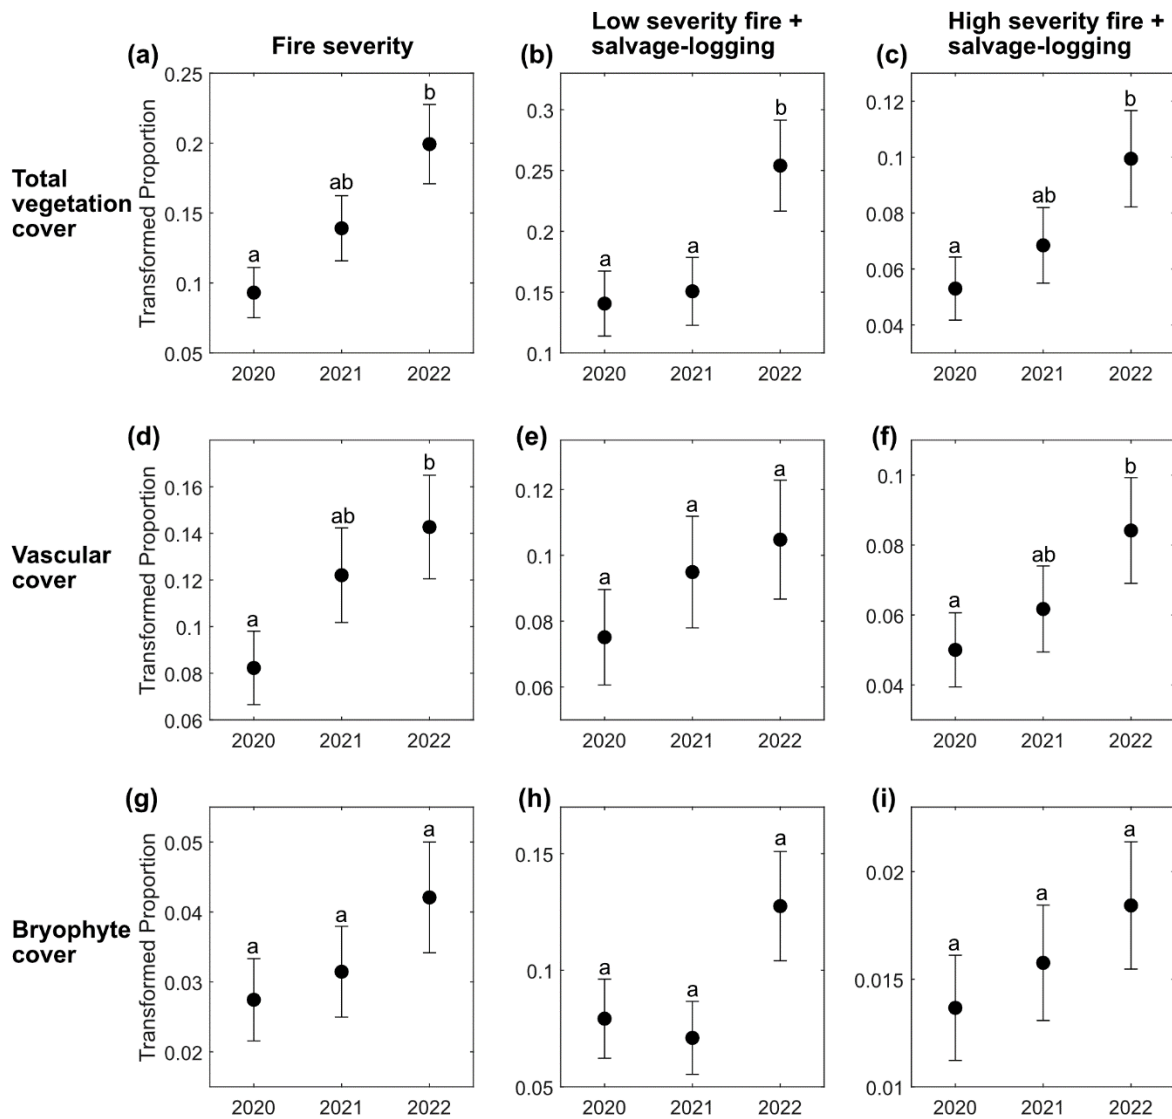

77

78 Figure S5. Modelled annual mean  $\pm$  SE of total vegetation cover, vascular plant and bryophyte cover for  
 79 each site group based on beta regressions. Different letters above the bars indicate significant differences  
 80 between the years according to chi-square likelihood ratio tests.
